# Supplementary material for: Visible-light-driven H2 production from heterostructured Zn0.5Cd0.5S–TiO2 photocatalysts modified with reduced graphene oxides
Source: Royal Society of Chemistry journal article supplement (doi:10.1039/d1nj04195a), 2021-01-01
Supplement: d1nj04195a1.pdf [file d1nj04195a1.pdf]

# Visible-light-driven H<sub>2</sub> production from heterostructured Zn<sub>0.5</sub>Cd<sub>0.5</sub>S–TiO<sub>2</sub> photocatalysts modified with reduced graphene oxides†

 Author and affiliation details can be edited in the panel that appears to the right when you click on the author list.

Na Qin<sup>a,b</sup>, Aojie Mao<sup>a</sup>, Junhua Zou<sup>b</sup>, Liwei Mi,<sup>(ID 0000-0001-9239-6599)<sup>a,\*</sup></sup> and Ling Wu,<sup>(ID 0000-0003-2652-8105)<sup>b,\*</sup></sup>

<sup>a</sup>Center for Advanced Materials Research, Zhongyuan University of Technology, Zhengzhou 451191, Henan, China, [mlwzzu@163.com](mailto:mlwzzu@163.com)

<sup>b</sup>State Key Laboratory of Photocatalysis on Energy and Environment, Fuzhou University, Fuzhou 350002, Fujian, China, [wuling@fzu.edu.cn](mailto:wuling@fzu.edu.cn)

## Funding Information

 We have combined the funding information you gave us on submission with the information in your acknowledgements. This will help ensure the funding information is as complete as possible and matches funders listed in the Crossref Funder Registry. Please check that the funder names and award numbers are correct. For more information on acknowledging funders, visit our website: <http://www.rsc.org/journals-books-databases/journal-authors-reviewers/author-responsibilities/#funding>.

|                                   |                                              |
|-----------------------------------|----------------------------------------------|
| Funder Name :                     | National Natural Science Foundation of China |
| Funder's main country of origin : |                                              |
| Funder ID :                       | 10.13039/501100001809                        |
| Award/grant Number :              | 21273036                                     |
|                                   | 21872032                                     |

## Table of Contents Entry

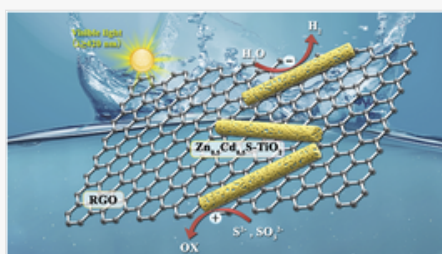

Benefiting from the heterojunction structure and compositional features, the optimized 0.5%RGO/50%Zn<sub>0.5</sub>Cd<sub>0.5</sub>S–TiO<sub>2</sub> composites exhibited considerable photocatalytic activities for H<sub>2</sub> evolution.

## Abstract

Although, hydrogen is a promising green energy source, current catalysts for hydrogen production cannot use the full range of visible light. In addition, these catalysts suffer from problems such as rapid charge-carrier recombination. Therefore, a simple strategy to synthesize high-performance catalysts for visible-light-driven H<sub>2</sub> production is required. One promising method of increasing catalyst efficiency is the use of a heterojunction structure. Therefore, in this study,

Zn<sub>0.5</sub>Cd<sub>0.5</sub>S–TiO<sub>2</sub> (ZCS–TiO<sub>2</sub>) heterojunction photocatalysts were prepared *via* the controlled growth of Zn<sub>0.5</sub>Cd<sub>0.5</sub>S using a facile solvothermal method. The ZCS–TiO<sub>2</sub> heterojunction photocatalysts showed high hydrogen production performance from water upon exposure to visible light as a result of the increased separation of photogenerated charges. Based on this success, we further modified the surface of the Zn<sub>0.5</sub>Cd<sub>0.5</sub>S–TiO<sub>2</sub> catalyst with a reduced graphene oxide (RGO) cocatalyst to produce RGO/ZCS–TiO<sub>2</sub> composite heterojunction photocatalysts. These ternary composite heterojunction photocatalysts also showed good hydrogen production from water because of the enhanced electron transport endowed by RGO and the matching band structure between Zn<sub>0.5</sub>Cd<sub>0.5</sub>S and TiO<sub>2</sub>. Furthermore, we investigated the effects of different loadings of RGO, as well as the use of physical mixtures, on the catalytic activity; the optimized 0.5%RGO/50%ZCS–TiO<sub>2</sub> composite exhibited distinctly greater photocatalytic activity than the 50%ZCS–TiO<sub>2</sub> and ZCS catalysts, as well as the 0.5%Pt/50%ZCS–TiO<sub>2</sub> catalyst. Thus, our study demonstrates a new approach for obtaining highly efficient ZCS-based photocatalysts.

## 1. Introduction

Hydrogen (H<sub>2</sub>) has attracted much attention as a source of clean energy and an alternative to fossil fuels. However, to be a truly green replacement for fossil fuels, the production of H<sub>2</sub> from renewable resources is necessary. The photocatalytic splitting of water with solar energy is a promising method in this regard because of its low cost and environmental friendliness. To date, many sulfide-based semiconductor materials for photocatalytic H<sub>2</sub> production have been reported because of their suitable band edge positions and narrow band gaps for visible light absorption.<sup>1–5</sup> For example, Zn<sub>x</sub>Cd<sub>1–x</sub>S is regarded as an efficient photocatalyst for H<sub>2</sub> production because of its controllable bandgap width and band-edge position.<sup>6–8</sup> However, its photocatalytic H<sub>2</sub> production performance is insufficient for practical applications because of the large particle size, which results in a low number of active sites, as well as the rapid recombination of photogenerated electrons and holes. Therefore, a range of methods such as doping, semiconductor coupling, and cocatalyst loading have been used to improve the catalytic performance of Zn<sub>x</sub>Cd<sub>1–x</sub>S for H<sub>2</sub> production.<sup>9–12</sup> In particular, to promote the separation of photogenerated charges, obtain a large number of surface active sites, efficiently utilize visible light, and enhance the photocatalytic H<sub>2</sub> production performance of Zn<sub>x</sub>Cd<sub>1–x</sub>S, the band structure and composition of multifunctional composites should be optimized.

Recently, one-dimensional (1D) TiO<sub>2</sub> nanostructured materials, such as nanofibers, nanotubes, and nanobelts, have been shown to have significant potential in numerous fields.<sup>13–17</sup> Among these 1D TiO<sub>2</sub> nanostructured materials, nanofibers, which are prepared using a simple electrospinning technique, have attracted particular attention. The 1D electrospun TiO<sub>2</sub> nanofibers have a large aspect ratio, high surface area, and significant porosity, making them useful for photocatalytic applications.<sup>18,19</sup> In addition, they can be assembled into secondary nanostructures with high densities without aggregation, promote the mobility and isolation of photogenerated charge carriers, and aid the recycling of photocatalysts.<sup>20</sup> Concerning sulfide-based photocatalysts, electrospun TiO<sub>2</sub> nanofibers are a suitable support for Zn<sub>x</sub>Cd<sub>1–x</sub>S because of their matched conduction bands.<sup>21</sup> Recent studies have shown that the construction of heterojunctions is an effective strategy to promote the spatial separation and effective utilization of photoinduced charges, because the photogenerated electrons and holes can be driven in opposite directions under an applied electric field.<sup>22,23</sup> Therefore, in this study, Zn<sub>0.5</sub>Cd<sub>0.5</sub>S (ZCS) was supported on electrospun TiO<sub>2</sub> nanofibers for constructing ZCS-based heterogeneous photocatalysts to enhance the photocatalytic water splitting performance of ZCS.

In addition, to increase the number of surface active sites for H<sub>2</sub> production in ZCS on the 1D electrospun TiO<sub>2</sub> nanofibers, surface modification with cocatalysts was exploited.<sup>24</sup> Noble metals have been demonstrated to be effective cocatalysts for the H<sub>2</sub> evolution reaction,<sup>25,26</sup> but their high cost and scarcity limit their extensive applications. In recent years, graphene has emerged as a common non-noble-metal cocatalyst that has been widely used in photocatalysis because of its large specific surface area, high stability, good electron mobility, and modifiable surface structure.<sup>27–29</sup> In fact, graphene semiconductors show excellent performance for photocatalytic H<sub>2</sub> production from water because of their unique two-dimensional structure and good electron conducting ability.<sup>30–33</sup> Therefore, we modified our ZCS–TiO<sub>2</sub> catalyst with graphene to enhance the H<sub>2</sub> production activity. Crucially, the unmodified and reduced graphene oxide (RGO)-modified ZCS–TiO<sub>2</sub> photocatalysts were prepared using a simple solvothermal method.

We found that the introduction of TiO<sub>2</sub> nanofibers greatly reduced the size of the ZCS nanoparticles and firmly anchored the ZCS to the surface of the nanofibers, thus forming a heterojunction; this significantly reduced carrier recombination in the ZCS and thus improved the photocatalytic H<sub>2</sub> production activity. Furthermore, the introduction of RGO not only enhanced photogenerated electron transfer and separation at the interface but also acted as a cocatalyst to improve the photocatalytic performance of ZCS–TiO<sub>2</sub>. Therefore, RGO/ZCS–TiO<sub>2</sub> is a promising system for enhanced visible light photocatalytic H<sub>2</sub> production activity and charge separation.

## 2. Experimental

### 2.1. Chemicals

All chemicals were purchased from commercial sources and used without further purification. Deionized water was used during all experiments.

### 2.2. Photocatalyst synthesis

Zn<sub>0.5</sub>Cd<sub>0.5</sub>S (ZCS) supported on TiO<sub>2</sub> nanofibers was prepared through a solvothermal process. The TiO<sub>2</sub> nanofibers were firstly prepared according to our previous works.<sup>34</sup> Then, 25 mg TiO<sub>2</sub> nanofibers and Cd(Ac)<sub>2</sub>·2H<sub>2</sub>O and Zn(Ac)<sub>2</sub>·2H<sub>2</sub>O in a molar ratio of 1 were added to 30 mL of mixed solution containing deionized water and ethanol (v : v = 1 : 1) to form solution A. Meanwhile, 10 mmol of thiourea was dissolved into another 30 mL solution containing deionized water and ethanol (v : v = 1 : 1) to form solution B. Next, solution B was dropped into solution A with stirring and ultrasonication. Subsequently, the mixed solution was transferred into a 100 mL autoclave and maintained at 180 °C for 12 h. After cooling, the precipitates were collected and washed with deionized water and ethanol several times and dried at 60 °C overnight. The obtained products are denoted (X)ZCS–TiO<sub>2</sub>, where (X) = 20%, 30%, 50%, and 70%, representing the amounts of ZCS (20–70%) in the as-prepared ZCS–TiO<sub>2</sub> composites. Additionally, pure ZCS was synthesized using the same method but without the addition of TiO<sub>2</sub> nanofibers.

Details of the preparation of graphene oxide (GO) are provided in the (ESI<sup>†</sup>). The RGO-wrapped ZCS–TiO<sub>2</sub> composites (RGO/ZCS–TiO<sub>2</sub>) were prepared as for (50%)ZCS–TiO<sub>2</sub>, except that an aqueous dispersion of graphene oxide (GO) was added to solution A. Based on the amount of GO, the obtained composites were denoted (x)RGO/(50%)ZCS–TiO<sub>2</sub>, where x = 0.25%, 0.5%, and 1.0%. For comparison, 0.5%Pt/50%ZCS–TiO<sub>2</sub> composites were fabricated by a photodeposition method using H<sub>2</sub>PtCl<sub>6</sub>·6H<sub>2</sub>O as the Pt source.

If not specified, ZCS–TiO<sub>2</sub> and RGO/ZCS–TiO<sub>2</sub> indicate (50%)ZCS–TiO<sub>2</sub> and (0.5%)RGO/(50%)ZCS–TiO<sub>2</sub>, respectively.

### 2.3. Characterization

Powder X-ray diffraction (PXRD) patterns were obtained using a Bruker D8 Advance X-ray diffractometer with Cu K $\alpha$  radiation generated at 40 kV and 40 mA. Raman spectra were collected at room temperature on an inVia Reflex Micro-Raman Spectroscopy System (Renishaw Co.) with a 532 nm excitation source. Scanning electron microscopy (SEM, Hitachi New Generation SU8010) and transmission electron microscopy (JEM-2010, FEI, Tecnai G2 F20 FEG) were used to characterize the micromorphologies of the samples. UV-vis diffuse reflectance spectra were recorded on a Cary 500 UV-vis-NIR spectrophotometer with BaSO<sub>4</sub> as the background. X-ray photoelectron spectroscopy (XPS) measurements were carried out using a PHI Quantum 2000 XPS system with a monochromatic Al K $\alpha$  source. The Brunauer–Emmett–Teller (BET) specific surface areas of the samples were measured with an ASAP2020M instrument. Photoluminescence (PL) spectra were obtained at room temperature on an Edinburgh FLS980 fluorescence spectrophotometer using a 365 nm excitation light source.

The photoelectrochemical measurements were carried out in a three-electrode system having an Ag/AgCl electrode and a Pt wire as the reference and counter electrodes, respectively. The photocurrent was measured *via* a BAS Epsilon workstation with a 300 W Xe lamp (PLS-SXE 300C, Beijing Perfectlight) equipped with a 420 nm cut-off filter as the visible light source. The electrochemical impedance spectra (EIS) were recorded using an electrochemical analyzer (Zahner, Germany).

### 2.4. Photoactivity tests

The photocatalytic H<sub>2</sub> production experiments were carried out in a Pyrex reaction cell with a closed gas circulation and evacuation system. A 300 W xenon lamp (PLS-SXE300C, Perfectlight Co., Beijing) equipped with a cut-off filter ( $\lambda \geq 420$  nm) was used as the visible light source. In a typical photocatalytic test, 20 mg of the photocatalyst was mixed with 80 mL aqueous solution containing 0.35 M Na<sub>2</sub>S and 0.25 M Na<sub>2</sub>SO<sub>3</sub>. The amount of evolved H<sub>2</sub> was quantitatively analyzed *via* online gas chromatography (GC).

### 3. Results and discussion

(X)ZCS–TiO<sub>2</sub> and (X)RGO/ZCS–TiO<sub>2</sub> composites were prepared through a solvothermal process, and we subsequently collected PXRD patterns of the materials to identify the crystalline phases. As shown in Fig. 1, the reflections corresponding to the TiO<sub>2</sub> nanofibers can be fully indexed to the standard peaks of anatase TiO<sub>2</sub> (JCPDS, No. 21-1272).<sup>35</sup> The diffraction peaks of ZCS are slightly shifted in comparison with those of ZnS (JCPDS, No. 77-2100) and CdS (JCPDS, No. 41-1049), which is consistent with the results of previous works and indicates the formation of a solid solution.<sup>36,37</sup> Moreover, the PXRD patterns of the ZCS–TiO<sub>2</sub> composites are matched well with those of anatase TiO<sub>2</sub> and ZCS, indicating that the crystal structure of the TiO<sub>2</sub> nanofibers is well maintained, and that ZCS was successfully loaded on the TiO<sub>2</sub> nanofiber surface (Fig. S1a, ESI<sup>†</sup>). However, no distinctive diffraction peaks corresponding to RGO were observed in the PXRD patterns of the RGO/ZCS–TiO<sub>2</sub> composites (Fig. S1b, ESI<sup>†</sup>), possibly because of its low loading and poor crystallinity.<sup>23,38</sup> Raman spectroscopy is a powerful tool for the analysis of carbon-containing systems such as graphene, so Raman spectra of the samples were obtained. As shown in Fig. S2 (ESI<sup>†</sup>), two characteristic peaks for the D (disordered) and G (graphitic) bands at 1345 and 1587 cm<sup>-1</sup>, respectively, are visible in the spectra of the GO and 0.5%RGO/50%ZCS–TiO<sub>2</sub> samples. The ratio of intensities of the D and G bands ( $I_D/I_G$ ) is a measure of the degree of disorder of a graphitic system, and this value for the RGO/ZCS–TiO<sub>2</sub> (1.02) composite was larger than that for pristine GO (0.96), indicating that the GO was partially reduced during the solvothermal process. These results indicate the presence of RGO in the RGO/ZCS–TiO<sub>2</sub> composites.

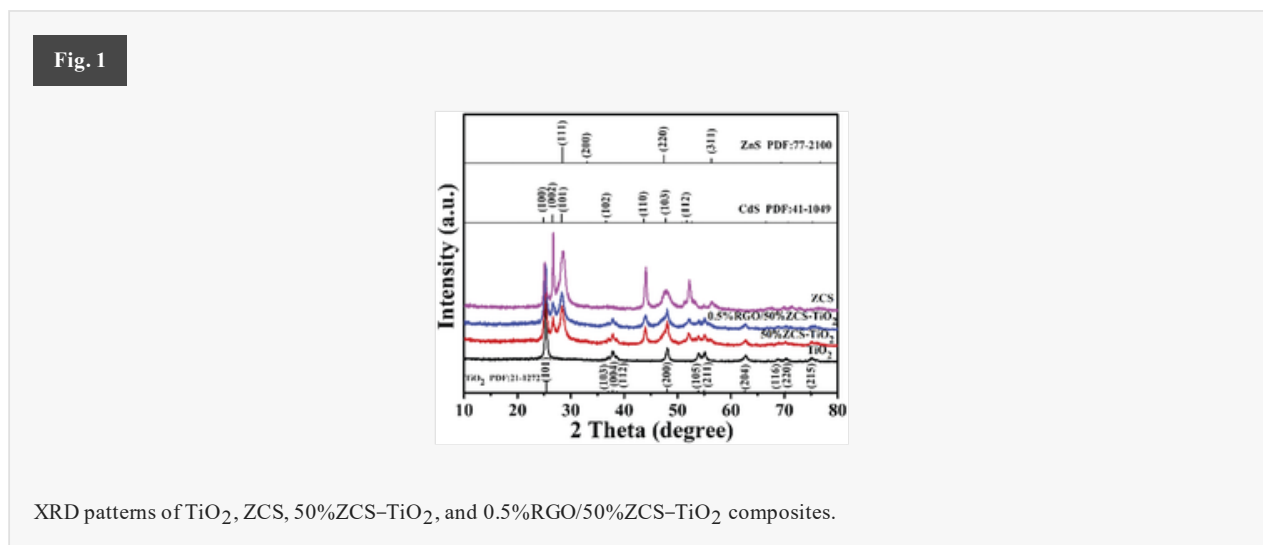

Next, SEM and TEM images were obtained to observe the micro-morphologies of the as-prepared samples. As shown in Fig. 2a, the TiO<sub>2</sub> nanofibers have a typical cable-like morphology, and each fiber has a diameter of about 150 nm and a length of several micrometers. In contrast, the pure ZCS nanoparticles are spherical-like nanoparticles having an average size of about 300 nm (Fig. 2b). However, as a result of the unique one-dimensional morphology of the TiO<sub>2</sub> nanofibers, the agglomeration of ZCS nanoparticles was significantly reduced in the nanofiber-containing samples. In particular, small ZCS nanoparticles (between 5 and 20 nm in size) can be seen uniformly anchored on the TiO<sub>2</sub> nanofiber surface, even up to ZCS contents of 70% (Fig. S3a–d, ESI<sup>†</sup>), as shown in the TEM image (Fig. 2c), implying the formation of a heterostructure interface. The (HR)TEM image of 50%ZCS–TiO<sub>2</sub> (Fig. 2d) reveals the contact interface of ZCS and TiO<sub>2</sub>. The lattice planes are visible, and the *d*-spacings of 0.35 and 0.31 nm can be assigned to the (101) planes of anatase TiO<sub>2</sub> and (101) planes of ZCS, respectively, which is consistent with the PXRD results, further demonstrating the successful synthesis of the ZCS–TiO<sub>2</sub> heterostructure composites. This close interfacial contact can facilitate interfacial charge transfer between ZCS and TiO<sub>2</sub>. In addition, energy dispersive X-ray (EDX) analysis (Fig. S4, ESI<sup>†</sup>) revealed the presence of Ti, O, Zn, Cd, S, and C in the samples.

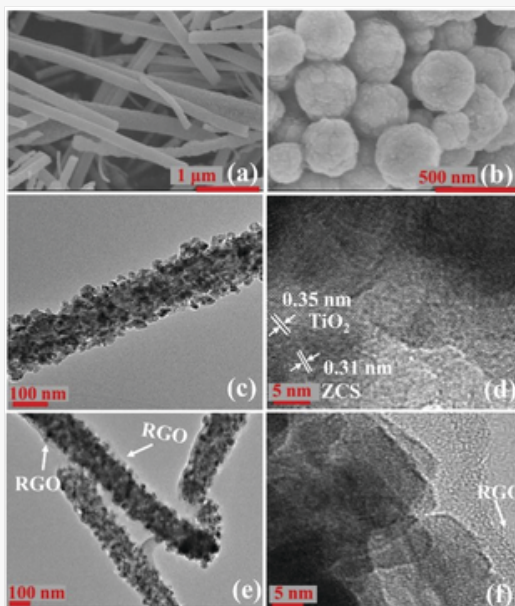

SEM images of (a) TiO<sub>2</sub> nanofibers, (b) ZCS, (c and d) TEM and HRTEM images of 50%ZCS-TiO<sub>2</sub>, (e and f) TEM and HRTEM images of 0.5%RGO/50%ZCS-TiO<sub>2</sub>.

Meanwhile, the N<sub>2</sub> adsorption–desorption isotherms were measured. As shown in Fig. S5 and Table S1 (ESI<sup>†</sup>), the BET surface areas of the ZCS–TiO<sub>2</sub> composites (32.10–38.04 m<sup>2</sup> g<sup>-1</sup>) are significantly greater than that of pure ZCS (7.61 m<sup>2</sup> g<sup>-1</sup>), which should result in the exposure of more active sites, and thus greater photocatalytic activity. Moreover, as expected, the introduction of RGO did not affect the morphology of the ZCS–TiO<sub>2</sub> composites (Fig. 2e). We also noted that ZCS–TiO<sub>2</sub> was tightly wrapped with ultrathin RGO nanosheets (Fig. 2e and f). According to previous reports, a close contact between ZCS–TiO<sub>2</sub> and RGO facilitates the transfer of photogenerated electrons, thus improving the separation efficiency of the photogenerated electron–hole pairs, and enhancing the photocatalytic performance.

Afterward, the UV-visible diffuse reflectance spectra of pure TiO<sub>2</sub>, pure ZCS, and ZCS–TiO<sub>2</sub>, as well as the RGO wrapped ZCS–TiO<sub>2</sub> composites, were used to evaluate their light absorption ability, which is crucial for determining their photocatalytic performance. It is clearly exhibited in Fig. 3a that pure TiO<sub>2</sub> absorbs UV light, and pure ZCS absorbs both UV and visible light. The band gaps of TiO<sub>2</sub> and ZCS were 3.22 eV and 2.44 eV (Fig. S6, ESI<sup>†</sup>), respectively, as calculated from the intercept of the tangents in the plot of the Kubelka–Munk function *versus* photon energy ( $h\nu$ ).<sup>39</sup> The band gaps of the samples are listed in Table S2 (ESI<sup>†</sup>). Although the ZCS–TiO<sub>2</sub> composites have a similar light absorption range to ZCS, the absorption intensity is much reduced, but, as the ZCS content increased, the light absorption intensity gradually increased. Meanwhile, the absorption band edges of the ZCS–TiO<sub>2</sub> composites are blue-shifted compared to that of ZCS, possibly as a result of quantum confinement effects in the small ZCS nanoparticles in the ZCS–TiO<sub>2</sub> composites (see SEM images in Fig. S3, ESI<sup>†</sup> and TEM images in Fig. 2).<sup>40</sup> In addition, we also found (Fig. 3b) that the addition of RGO affects the absorption band edges of the ZCS–TiO<sub>2</sub> composites and enhances their visible light absorption, which may be beneficial for improving their photocatalytic performance.

Fig. 3

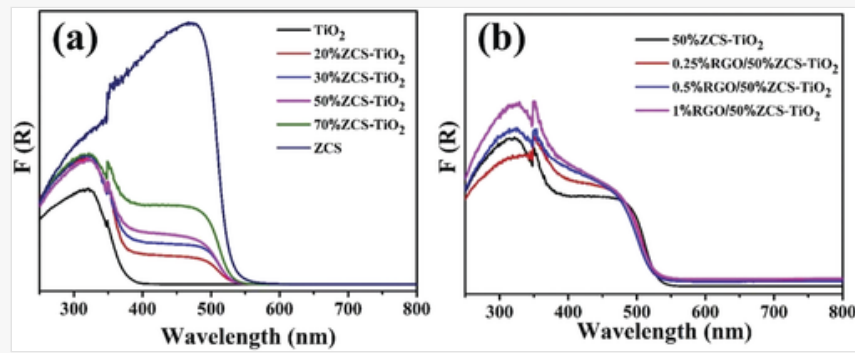

UV-vis diffuse reflectance spectra of (a)  $\text{TiO}_2$ , ZCS, and ZCS- $\text{TiO}_2$  composites with different weight ratios of ZCS, and (b) RGO/ZCS- $\text{TiO}_2$  composites with different weight ratios of RGO.

Furthermore, XPS measurements were used to analyze the chemical compositions and electronic states of the as-prepared samples. As shown in Fig. 4a, the Ti 2p spectrum displays two strong peaks at 458.7 and 464.4 eV, corresponding to Ti 2p<sub>3/2</sub> and Ti 2p<sub>1/2</sub> of  $\text{TiO}_2$ , respectively. Notably, the Ti 2p binding energies for ZCS- $\text{TiO}_2$  are lower than those of pure  $\text{TiO}_2$ , suggesting that electrons are transferred from  $\text{TiO}_2$  to ZCS at the interface. In the pure ZCS sample, the peaks at 1045.6 and 1022.6 eV in the Zn 2p spectrum (Fig. 4b) can be assigned to the Zn 2p<sub>1/2</sub> and Zn 2p<sub>3/2</sub> electronic configurations of the +2 oxidation state, respectively. In addition, the peaks at 411.5 and 404.8 eV (Fig. 4c) in Cd 2p spectra correspond to the presence of  $\text{Cd}^{2+}$ . In comparison with those of pure ZCS, the Zn 2p binding energies for ZCS- $\text{TiO}_2$  are shifted to lower energies, whereas the  $\text{Cd}^{2+}$  3d peaks are shifted to higher binding energies, suggesting that ZCS formed a strong interaction with the  $\text{TiO}_2$  nanofibers. Thus, the XPS results suggest that an intimate heterojunction was formed between  $\text{TiO}_2$  and ZCS. In addition, the XPS results also indicate that, after the introduction of RGO, a large number of oxygen-containing functional groups were added (Fig. S7, ESI<sup>†</sup>). However, the peak intensities related to oxygen-containing functional groups on the surface of 0.5%RGO/50%ZCS- $\text{TiO}_2$  were significantly reduced compared to those of GO, suggesting that the GO was effectively reduced to RGO by the solvothermal reduction.

Fig. 4

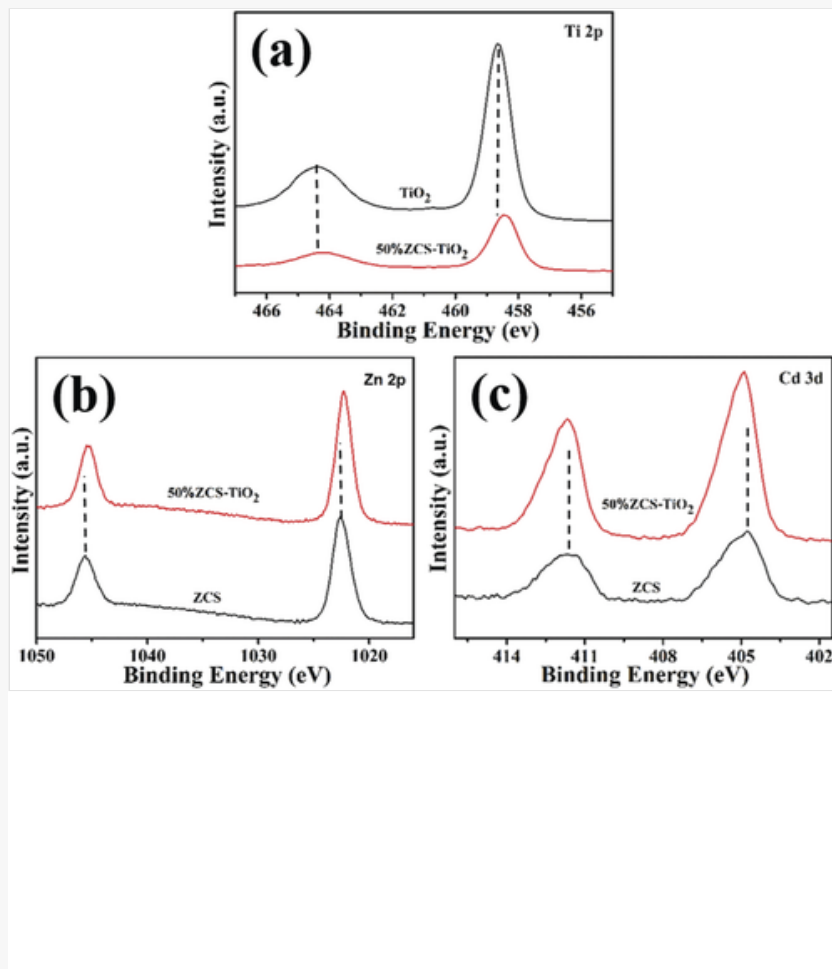

Comparisons of Ti 2p (a) XPS spectra of TiO<sub>2</sub> and 50%ZCS-TiO<sub>2</sub>, comparisons of Zn 2p and Cd 3d (c) XPS spectra of ZCS and 50%ZCS-TiO<sub>2</sub>.

The photocatalytic H<sub>2</sub> evolution activities of the as-prepared samples were evaluated in a Pyrex reaction cell under visible light irradiation, in which Na<sub>2</sub>S and Na<sub>2</sub>SO<sub>3</sub> were used as the sacrificial agents, and pure ZCS was used as a reference sample. No H<sub>2</sub> evolution was detected in the absence of light or photocatalysts. As shown in Fig. 5a, a negligible photocatalytic activity is observed in the presence of TiO<sub>2</sub> and Pt/TiO<sub>2</sub>. Pure ZCS exhibited poor photocatalytic activity, yielding an H<sub>2</sub> evolution rate of merely 74.4 μmol h<sup>-1</sup>, whereas the ZCS-TiO<sub>2</sub> composites showed much improved photocatalytic activities. In particular, 50%ZCS-TiO<sub>2</sub> yielded an H<sub>2</sub> production rate of 170.3 μmol h<sup>-1</sup>, which is about 2.3 times higher than that of pure ZCS. However, the performance of an equivalent mechanically mixed sample (denoted as 50%ZCS + TiO<sub>2</sub>) was significantly worse than that of the solvothermally prepared sample (*i.e.*, 50%ZCS-TiO<sub>2</sub>). The poor photocatalytic activity of pure ZCS is mainly attributed to the fast recombination of the photogenerated electrons and holes and a limited number of exposed active sites. Therefore, the high dispersion of ultra-small ZCS nanoparticles tightly affixed to the TiO<sub>2</sub> nanofibers could not only significantly increase the number of exposed active sites but also accelerate the separation of the photogenerated carriers by forming a heterojunction between ZCS and TiO<sub>2</sub>, thereby boosting the photocatalytic activity.

Moreover, it has been reported that RGO/graphene is an excellent a good electron shuttle for photogenerated electrons, as well as an excellent metal-free cocatalyst for photocatalytic reactions. Therefore, the decoration of the catalyst surface with RGO may be the reason for the improvement in the photocatalytic activity of the ZCS-TiO<sub>2</sub> composites. Indeed, taking 50%ZCS-TiO<sub>2</sub> as an example, the addition of a small amount of RGO (0.5 wt%) enhanced the H<sub>2</sub> production rate to 299.0 μmol h<sup>-1</sup> (Fig. 5b), approximately 1.8 times higher than that of the pristine catalyst, 2.9 times higher than that of 0.5 wt%RGO/ZCS, and 1.4 times higher than that of the 50%ZCS-TiO<sub>2</sub> catalyst loaded with 0.5 wt% Pt (0.5 wt%Pt/50%ZCS-TiO<sub>2</sub>) (Fig. S8, ESI<sup>†</sup>). However, the addition of excess RGO has a negative effect on the photocatalytic activity, possibly hindering light absorption by the ZCS-TiO<sub>2</sub> composite.<sup>41,42</sup> The apparent quantum efficiency (AQE) of 0.5%RGO/50%ZCS-TiO<sub>2</sub> is 11.9% at 420 nm. The photocatalytic performance of the 0.25%RGO/0.5%Pt(50%)ZCS-TiO<sub>2</sub> sample was 1.8 fold higher than that of the 0.25%RGO/50%ZCS-TiO<sub>2</sub> sample (Fig. S9, ESI<sup>†</sup>), which could be attributed to the introduction of Pt as a cocatalyst, which effectively improved the

photocatalytic activity. For the 0.5%RGO/0.5%Pt(50%)ZCS–TiO<sub>2</sub> and 1%RGO/0.5%Pt(50%)ZCS–TiO<sub>2</sub> samples, the activity was almost unchanged. High concentrations of RGO can effectively promote the transfer of photogenerated electrons, leading to excellent activity, nullifying the role of Pt as a cocatalyst. Therefore, we can conclude that GO serves as an excellent cocatalyst in this system. Table S3 (ESI<sup>†</sup>) shows the comparative photocatalytic H<sub>2</sub> evolution over CdS-based and RGO-based photocatalysts, which indicates the excellent activity of the RGO/ZCS–TiO<sub>2</sub> nanocomposites.

Fig. 5

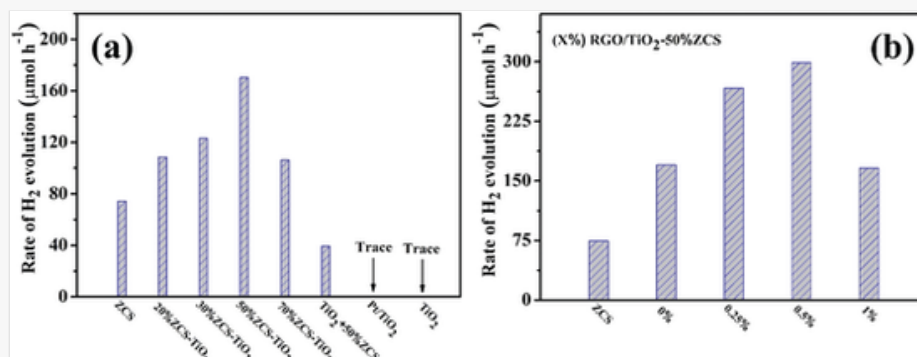

(a) Photocatalytic H<sub>2</sub> evolution rate over ZCS, TiO<sub>2</sub>, Pt/TiO<sub>2</sub>, a mechanical mixture of TiO<sub>2</sub> and ZCS, ZCS–TiO<sub>2</sub> composites with different weight ratios of ZCS, (b) photocatalytic H<sub>2</sub> evolution rate over ZCS and RGO/50%ZCS–TiO<sub>2</sub> composites with different weight ratios of RGO. (Reaction conditions: 80 mL H<sub>2</sub>O containing 0.35 M Na<sub>2</sub>S and 0.25 M Na<sub>2</sub>SO<sub>3</sub>; visible light ( $\lambda \geq 420$  nm); catalyst: 20 mg.)

In addition, the photocatalytic stability of the RGO-decorated ZCS–TiO<sub>2</sub> composite (0.5%RGO/50%ZCS–TiO<sub>2</sub>) was further investigated using recycling tests. As shown in Fig. 6a, the H<sub>2</sub> evolution rate of the composite did not deteriorate over four reuse cycles, indicating its stability. Meanwhile, the PXRD patterns (Fig. 6b) of the composite remained similar to that of the original sample after the recycling tests, further demonstrating that the RGO/ZCS–TiO<sub>2</sub> composites are stable and recyclable photocatalysts. In addition, SEM observations (Fig. S10a and b, ESI<sup>†</sup>) and XPS measurements (Fig. S10c–e, ESI<sup>†</sup>) revealed no significant changes in the morphology and surface chemical states of the sample before and after the catalytic reaction. The abovementioned results demonstrate that the RGO/ZCS–TiO<sub>2</sub> composites show excellent reusability and stability during the catalytic reaction.

Fig. 6

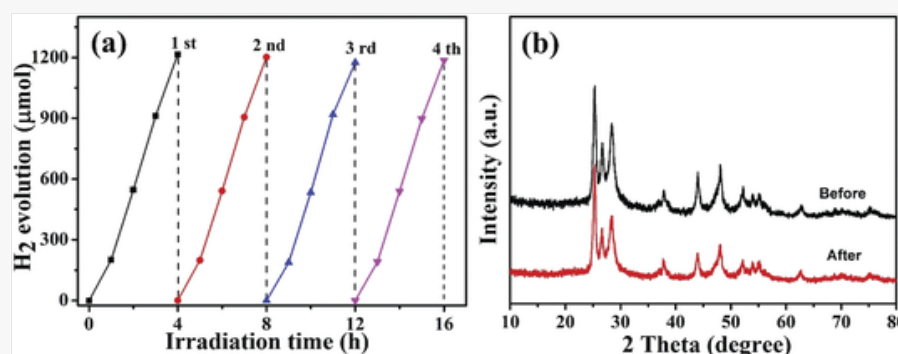

(a) Cycle runs for the photocatalytic H<sub>2</sub> production of 0.5%RGO/50%ZCS–TiO<sub>2</sub>, and (b) XRD patterns of 0.5%RGO/50%ZCS–TiO<sub>2</sub> before and after the photocatalytic reaction.

We also carried out electrochemical measurements to identify the origin of the enhanced photocatalytic performance of the RGO/ZCS–TiO<sub>2</sub> composites. Fig. 7a shows the photocurrent spectra of different samples under visible light irradiation. The photocurrent of 50%ZCS–TiO<sub>2</sub> is much greater than those of pure ZCS, TiO<sub>2</sub>, and 50%ZCS + TiO<sub>2</sub>, indicating that the high dispersion of ultra-small ZCS particles on the TiO<sub>2</sub> surface improves the separation of



photogenerated carriers. As expected, the decoration of the catalyst surface with RGO can significantly increase the photocurrent, further indicating the accelerated transfer photogenerated electrons, thus improving the separation efficiency of the photogenerated electron–hole pairs. Moreover, EIS measurements were used to understand the charge transfer kinetics. As shown by the Nyquist plots in Fig. 7b, 0.5%RGO/50%ZCS–TiO<sub>2</sub> has a much smaller semicircle diameter than those of 50%ZCS–TiO<sub>2</sub>, TiO<sub>2</sub>, 50%ZCS + TiO<sub>2</sub> and ZCS, further demonstrating that the high dispersion of ultra-small ZCS particles on the TiO<sub>2</sub> nanofiber surface and the introduction of RGO effectively promote the transfer of photogenerated electrons and lead to enhanced photocatalytic activity.

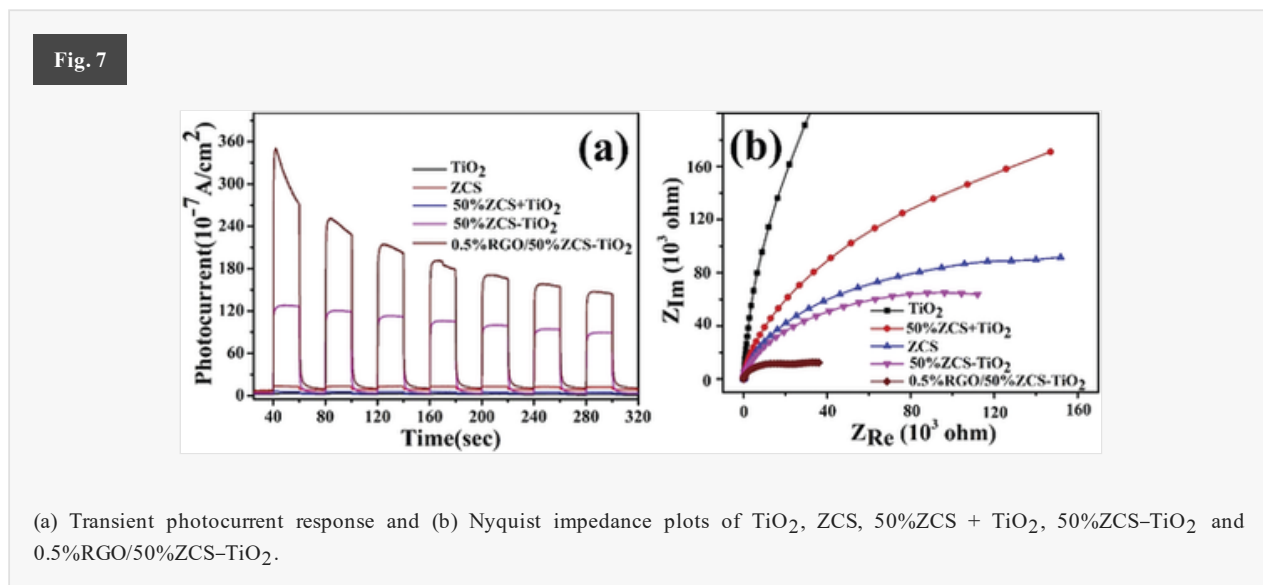

PL spectra are useful to reveal the charge transfer and charge-carrier separation behavior of photocatalysts. As shown in Fig. S11 (ESI<sup>†</sup>), the PL intensity of 50%ZCS–TiO<sub>2</sub> is much lower than those of ZCS and 50%ZCS + TiO<sub>2</sub>, implying significantly less electron–hole recombination. The enhanced charge separation in 50%ZCS–TiO<sub>2</sub> can be ascribed to the formation of a heterojunction between ZCS and TiO<sub>2</sub>. After RGO was introduced into the 50%ZCS–TiO<sub>2</sub> system, the PL intensity reached the lowest value with respect to the ZCS, 50%ZCS + TiO<sub>2</sub> and 50%ZCS–TiO<sub>2</sub> systems, indicating that this sample has the highest photogenerated charge separation efficiency, which is likely the reason for the superior photocatalytic H<sub>2</sub> evolution activity; that is, the fast interfacial electron transfer from the light-trapping centers in ZCS to RGO through TiO<sub>2</sub>. Furthermore, the PL spectra analyses are also consistent with the photocurrent and EIS results.

To identify the active species during hydrogen production, some sacrificial agents were used to capture active species. Fig. S12 (ESI<sup>†</sup>) shows the radical trapping experiments of 0.5%RGO/50%ZCS–TiO<sub>2</sub>, with the addition of *tert*-butyl alcohol (TBA) to trap hydroxyl radicals ( $\cdot\text{OH}$ ) and CCl<sub>4</sub> to trap e<sup>-</sup>.<sup>43,44</sup> The photocatalytic performance of 0.5%RGO/50%ZCS–TiO<sub>2</sub> reveals a drastic reduction in activity (~40%) after the addition of CCl<sub>4</sub>, which shows that e<sup>-</sup> electrons are the active species involved in the photocatalytic H<sub>2</sub> production. In contrast, the photocatalytic H<sub>2</sub> production activity is hardly affected by the addition of TBA (~12%). Hence, the active species contributing to the photocatalytic H<sub>2</sub> activity of the samples are e<sup>-</sup>.

Using the band gap energy ( $E_g$ ) of ZCS (2.44 eV) and the formulae  $E_{CB} = \chi - 0.5E_g - E_C$  and  $E_{VB} = \chi + 0.5E_g - E_C$  (vs. NHE),<sup>6,45,45</sup> where  $\chi$ ,  $E_g$ ,  $E_{CB}$ ,  $E_{VB}$ , and  $E_C$  are the absolute electronegativity of the composite and the energies of the band gap, conduction band, valence band, and free electrons, respectively, and  $\chi = 5.35$  eV and  $E^C = 4.5$  eV, we calculated  $E_{CB} = -0.37$  eV vs. NHE (pH = 0). Based on all of the results and the calculations above, a possible reaction mechanism for photocatalytic H<sub>2</sub> evolution over the RGO/ZCS–TiO<sub>2</sub> composites is proposed. As shown in Fig. 8, under visible light irradiation, ZCS is excited to generate photogenerated electron–hole pairs. The photogenerated electrons in the conduction band of ZCS can migrate to TiO<sub>2</sub> to promote the effective separation and transfer of photogenerated electron–hole pairs. When RGO is introduced, it promotes the separation of photogenerated carriers and extends their lifetimes. In addition, RGO not only promotes electron transport but acts as a non-noble metal H<sub>2</sub> production cocatalyst. Therefore, the photogenerated electrons that migrate to TiO<sub>2</sub> can further move to RGO, and RGO suppresses the recombination of the charge carriers and increases the photocatalytic H<sub>2</sub> evolution activity of RGO/ZCS–TiO<sub>2</sub>.

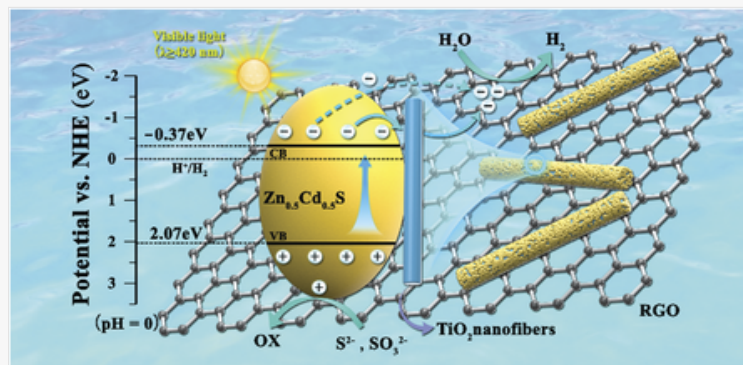

Schematic illustration of the possible charge transfer and separation in the RGO/ZCS–TiO<sub>2</sub> system under visible light illumination.

## 4. Conclusions

In summary, ZCS–TiO<sub>2</sub> heterojunction photocatalysts and composites with RGO were prepared using a facile solvothermal strategy. The ZCS–TiO<sub>2</sub> heterojunction photocatalysts containing 50% ZCS (0.5%RGO/50%ZCS–TiO<sub>2</sub>) showed the optimal performance for photocatalytic H<sub>2</sub> evolution: 2.3 and 4.3 times higher than those of ZCS alone and mechanically mixed samples, respectively. The superior photocatalytic performance of ZCS–TiO<sub>2</sub> is due to the formation of a heterojunction, which results in efficient charge transfer and separation. When RGO was introduced as a cocatalyst, the 0.5%RGO/50%ZCS–TiO<sub>2</sub> composites exhibited the best performance for photocatalytic H<sub>2</sub> evolution, 1.8 and 4.0 times better than those of 50%ZCS–TiO<sub>2</sub> and ZCS, respectively. Thus, the introduction of TiO<sub>2</sub> and RGO led to the formation of many electron transfer and transport paths, which effectively promoted the rapid separation and migration of photogenerated electron–hole pairs in the photocatalytically active ZCS component and further extended the lifetimes of the photogenerated charge carriers. Therefore, this study demonstrates the great potential of modified ZCS-based materials as photocatalysts for the photocatalytic H<sub>2</sub> evolution from water.

## Conflicts of interest

There are no conflicts to declare.

## Acknowledgements

This work was supported by the National Natural Science Foundation of China (No. 21872032 and 21273036), the Key Scientific and Technological Project of Henan Province (No. 202102210054), the independent innovation application research project (No. K2020YY001) and the Young Backbone Teacher of Zhongyuan University of Technology.

 References can be edited in the panel that appears to the right when you click on a reference.

- 1 X. Chen, S. Shen, L. Guo and S. S. Mao, *Chem. Rev.*, 2010, **110**, 6503–6570.
- 2 S. Chandrasekaran, L. Yao, L. Deng, C. Bowen, Y. Zhang, S. Chen, Z. Lin, F. Peng and P. Zhang, *Chem. Soc. Rev.*, 2019, **48**, 4178–4280.
- 3 Z. Gao, K. Chen, L. Wang, B. Bai, H. Liu and Q. Wang, *Appl. Catal., B*, 2020, **268**, 118462.
- 4 A. Kumar and V. Krishnan, *Adv. Funct. Mater.*, 2021, **31**, 2009807.
- 5 A. Kumar, A. Kumar and V. Krishnan, *ACS Catal.*, 2020, **10**, 10253–10315.

- 6 Z. Jin, T. Wei, F. Li, Q. Zhang and L. Xu, *New J. Chem.*, 2020, **44**, 3471–3477.
- 7 H.-B. Huang, Z.-B. Fang, K. Yu, J. Lü and R. Cao, *J. Mater. Chem. A*, 2020, **8**, 3882–3891.
- 8 X. J. Zhou, H. Yu, D. Zhao, X. C. Wang and S. T. Zheng, *Appl. Catal., B*, 2019, **248**, 423–429.
- 9 H. She, Y. Sun, S. Li, J. Huang, L. Wang, G. Zhu and Q. Wang, *Appl. Catal., B*, 2019, **245**, 439–447.
- 10 T. Yu, Z. Lv, K. Wang, K. Sun, X. Liu, G. Wang, L. Jiang and G. Xie, *J. Power Sources*, 2019, **438**, 227014.
- 11 Y. Zhang, Y.-Z. Lin, Z.-X. Wang, K. Li, T. Li and F.-T. Liu, *Catal. Sci. Technol.*, 2019, **9**, 583–587.
- 12 M. Ahmad, X. Quan, S. Chen, H. Yu and Z. Zeng, *Appl. Catal., B*, 2021, **283**, 119601.
- 13 Y. Xia, P. Yang, Y. Sun, Y. Wu, B. Mayers, B. Gates, Y. Yin, F. Kim and H. Yan, *Adv. Mater.*, 2003, **15**, 353–389.
- 14 L. Zhang, J. C. Yu, M. Mo, L. Wu, K. W. Kwong and Q. Li, *Small*, 2005, **1**, 349–354.
- 15 H. Li, Q. Zhou, Y. Gao, X. Gui, L. Yang, M. Du, E. Shi, J. Shi, A. Cao and Y. Fang, *Nano Res.*, 2015, **8**, 900–906.
- 16 E. N. Alvar, B. Zhou and S. H. Eichhorn, *J. Mater. Chem. A*, 2016, **4**, 6540–6552.
- 17 X. Zhang, X. Li, C. Shao, J. Li, M. Zhang, P. Zhang, K. Wang, N. Lu and Y. Liu, *J. Hazard. Mater.*, 2013, **260**, 892–900.
- 18 T. Cao, Y. Li, C. Wang, C. Shao and Y. Liu, *Langmuir*, 2011, **27**, 2946–2952.
- 19 C. J. Luo, S. D. Stoyanov, E. Stride, E. Pelan and M. Edirisinghe, *Chem. Soc. Rev.*, 2012, **41**, 4708–4735.
- 20 L. Hu, J. Yan, C. Wang, B. Chai and J. Li, *Chin. J. Catal.*, 2019, **40**, 458–469.
- 21 M. Kim, Y. K. Kim, S. K. Lim, S. Kim and S.-I. In, *Appl. Catal., B*, 2015, **166–167**, 423–431.
- 22 K. Zhang, Y. Dai, Z. Zhou, S. U. Jan, L. Guo and J. R. Gong, *Nano Energy*, 2017, **41**, 101–108.
- 23 C. Xue, H. Li, H. An, B. Yang, J. Wei and G. Yang, *ACS Catal.*, 2018, **8**, 1532–1545.
- 24 K. Chang, X. Hai and J. Ye, *Adv. Energy Mater.*, 2016, **6**, 1502555.
- 25 S. Kumar, N. L. Reddy, H. S. Kushwaha, A. Kumar, M. V. Shankar, K. Bhattacharyya, A. Halder and V. Krishnan, *ChemSusChem*, 2017, **10**, 3588–3603.
- 26 A. Meng, L. Zhang, B. Cheng and J. Yu, *ACS Appl. Mater. Interfaces*, 2019, **11**, 5581–5589.
- 27 K. I. Bolotin, K. J. Sikes, Z. Jiang, M. Klima, G. Fudenberg, J. Hone, P. Kim and H. L. Stormer, *Solid State Commun.*, 2008, **146**, 351–355.
- 28 M. D. Stoller, S. Park, Y. Zhu, J. An and R. S. Ruoff, *Nano Lett.*, 2008, **8**, 3498–3502.

- 29 F. He, A. Meng, B. Cheng, W. Ho and J. Yu, *Chin. J. Catal.*, 2020, **41**, 9–20.
- 30 Y.-J. Cho, H. Kim, S. Lee and W. Choi, *J. Catal.*, 2015, **330**, 387–395.
- 31 Y. Chen, H. Ge, L. Wei, Z. Li, R. Yuan, P. Liu and X. Fu, *Catal. Sci. Technol.*, 2013, **3**, 1712–1717.
- 32 K. Manjunath, V. S. Souza, G. Nagaraju, J. M. L. Santos, J. Dupont and T. Ramakrishnappa, *New J. Chem.*, 2016, **40**, 10172–10180.
- 33 A. Kumar, V. Navakoteswara Rao, A. Kumar, A. Mushtaq, L. Sharma, A. Halder, S. K. Pal, M. V. Shankar and V. Krishnan, *ACS Appl. Energy Mater.*, 2020, **3**, 12134–12147.
- 34 N. Qin, J. Xiong, R. Liang, Y. Liu, S. Zhang, Y. Li, Z. Li and L. Wu, *Appl. Catal., B*, 2017, **202**, 374–380.
- 35 X. Pan and Y.-J. Xu, *J. Phys. Chem. C*, 2015, **119**, 7184–7194.
- 36 J. Ran, J. Zhang, J. Yu and S. Z. Qiao, *ChemSusChem*, 2014, **7**, 3426–3434.
- 37 X. Zhou, N. Zhang, L. Yin, Y. Zhao and B. Zhang, *Ceram. Int.*, 2020, **46**, 26100–26108.
- 38 J. Zhang, J. Yu, M. Jaroniec and J. R. Gong, *Nano Lett.*, 2012, **12**, 4584–4589.
- 39 P. Jin, L. Wang, X. Ma, R. Lian, J. Huang, H. She, M. Zhang and Q. Wang, *Appl. Catal., B*, 2021, **284**, 119762.
- 40 X. Zong, Z. Xing, H. Yu, Y. Bai, G. Q. M. Lu and L. Wang, *J. Catal.*, 2014, **310**, 51–56.
- 41 L. Ye, J. Fu, Z. Xu, R. Yuan and Z. Li, *ACS Appl. Mater. Interfaces*, 2014, **6**, 3483–3490.
- 42 S. Liu, Z. Chen, N. Zhang, Z.-R. Tang and Y.-J. Xu, *J. Phys. Chem. C*, 2013, **117**, 8251–8261.
- 43 H. Tian, M. Liu and W. Zheng, *Appl. Catal., B*, 2018, **225**, 468–476.
- 44 H. Tian, K. Shen, X. Hu, L. Qiao and W. Zheng, *J. Alloys Compd.*, 2017, **691**, 369–377.
- 45 J. Song, H. Zhao, R. Sun, X. Li and D. Sun, *Energy Environ. Sci.*, 2017, **10**, 225–235.

## Footnotes

[†] Electronic supplementary information (ESI) available. See DOI: [10.1039/d1nj04195a](https://doi.org/10.1039/d1nj04195a)

## Queries and Answers

Q1

**Query:** For your information: You can cite this article before you receive notification of the page numbers by using the following format: (authors), *New J. Chem.*, (year), DOI: 10.1039/d1nj04195a.

**Answer:** Ok. Thank you.

Q2

**Query:** Have all of the author names been spelled and formatted correctly? Names will be indexed and cited as shown on the proof, so these must be correct. No late corrections can be made.

**Answer:** Yes

Q3

**Query:** Have all of the funders of your work been fully and accurately acknowledged?

**Answer:** Yes
